# Supplementary material
Source: PubMed Central journal article supplement (PMC5520135)
Supplement: hdy201712x1.pdf [file hdy201712x1.pdf]

**Supplementary Table S1.** Genomic locations of the transgene insertions.

| Construct | Line ID | Chr. | Cyt. band | Coord.   | Location                   | Affected gene                                           | Proximal gene                                       | Distal gene                                                   |
|-----------|---------|------|-----------|----------|----------------------------|---------------------------------------------------------|-----------------------------------------------------|---------------------------------------------------------------|
| CG2175    | A5      | 3L   | 67A1      | 9130609  | 5' UTR                     | <i>bol</i>                                              |                                                     | <i>Dhpr</i> ,<br><i>Use1</i>                                  |
| CG2175    | A6      | 2R   | 58A3      | 21871723 | inter                      |                                                         | <i>comr</i>                                         | <i>fili</i>                                                   |
| CG2175    | A7      | 3R   | 97D2      | 26798725 | inter                      |                                                         |                                                     | <i>Toll</i>                                                   |
| CG2175    | A8      | 3L   | 62E3      | 2488721  | intron                     | <i>CG45186</i>                                          |                                                     | <i>CG1146</i>                                                 |
| CG2175    | A9      | 3L   | 79E3      | 22407744 | 5' UTR                     | <i>Ten-m</i>                                            |                                                     |                                                               |
| CG2175    | A11     | Auto | NA        | NA       | NA                         | NA                                                      | NA                                                  | NA                                                            |
| CG2175    | A12     | 3R   | 92B4      | 19890040 | inter                      |                                                         | <i>ninaE</i>                                        | <i>CG4733</i>                                                 |
| CG2175    | A13     | 2L   | 25D6      | 5326408  | 5' UTR                     | <i>Ncoa6</i>                                            |                                                     | <i>cype</i> ,<br><i>CG1402</i> ,<br><i>TotM</i> , <i>fusl</i> |
| CG2175    | A14     | 3L   | 70C5      | 13924935 | intron                     | <i>Rgl</i>                                              |                                                     | <i>CG8833</i> ,<br><i>DCTN1-</i><br><i>p150</i>               |
| CG2175    | A15     | 2R   | 45B3      | 9185827  | 5' UTR /<br>intron         | <i>Rab32</i>                                            |                                                     | <i>CG8026</i> ,<br><i>CG45085</i>                             |
| CG2175    | A16     | 2L   | 33F4      | 12722477 | exon                       | <i>MRP</i>                                              | <i>Pih1D1</i>                                       |                                                               |
| CG2175    | A17     | 3R   | 84D9      | 7491848  | intron                     | <i>alpha-</i><br><i>Est10</i>                           |                                                     | <i>CG42656</i> ,<br><i>alpha-</i><br><i>Est9</i>              |
| CG2175    | X1      | X    | 1E1       | 991088   | 3'UTR                      | <i>CG18823</i>                                          |                                                     |                                                               |
| CG2175    | X3      | X    | 13C5      | 15498395 | intron                     | <i>Gmap</i>                                             |                                                     |                                                               |
| CG2175    | X4      | X    | 2A1       | 1399908  | inter                      |                                                         | <i>CG11448</i>                                      |                                                               |
| CG2175    | X5      | X    | 11B9      | 12663904 | intron                     | <i>Tis-11</i>                                           |                                                     |                                                               |
| CG2175    | X6      | X    | 1C2       | 686754   | inter                      |                                                         |                                                     | <i>sdk</i>                                                    |
| CG2175    | X7      | X    | 1E1       | 1033053  | intron,<br>3'UTR,<br>3'UTR | <i>CG33082</i> ,<br><i>su(w[a])</i> ,<br><i>CG14630</i> | <i>CG3021</i> ,<br><i>CDC45L</i>                    |                                                               |
| CG2175    | X8      | X    | 3B6       | 2789961  | intron                     | <i>CG32795</i>                                          | <i>kirre</i>                                        | <i>kirre</i> , <i>w</i>                                       |
| CG8982    | A5      | 3L   | 78A1      | 20949523 | exon                       | <i>fng</i>                                              |                                                     |                                                               |
| CG8982    | A7      | 2R   | 47C5      | 10874742 | 5'UTR                      | <i>CG30015</i>                                          |                                                     | <i>nclb</i> , <i>Taf-</i><br><i>5</i> , <i>Pex6</i>           |
| CG8982    | A10     | 3R   | 97E5      | 27151719 | 5'UTR                      | <i>Men-b</i>                                            | <i>CG6051</i>                                       |                                                               |
| CG8982    | A11     | 2L   | 26D1      | 6412175  | inter                      |                                                         | <i>DIP-ε</i>                                        | <i>CG13982</i> ,<br><i>tig</i>                                |
| CG8982    | A12     | 3R   | 90F11     | 18265277 | inter                      |                                                         |                                                     | <i>CG18599</i>                                                |
| CG8982    | A13     | 2R   | 55F8      | 18878361 | inter                      |                                                         |                                                     | <i>sano</i>                                                   |
| CG8982    | A14     | 3R   | 85E1      | 9630283  | intron                     | <i>Calr</i>                                             | <i>CG8312</i> ,<br><i>CG9427</i> ,<br><i>CG8319</i> | <i>SpdS</i> ,<br><i>Scm</i>                                   |

**Supplementary Table S1. Continued.**

|         |     |    |       |          |                    |                          |                                      |                                                  |
|---------|-----|----|-------|----------|--------------------|--------------------------|--------------------------------------|--------------------------------------------------|
| CG8982  | A15 | 2L | 26D7  | 6474121  | inter              |                          | <i>mmy</i>                           | CG9536,S<br><i>ec61alpha</i>                     |
| CG8982  | A18 | 3L | 70C10 | 13994467 | inter              |                          | CG17364,<br>CG9040                   | 26-29-p,<br>CG17361,<br>CG17359,<br><i>Nprl3</i> |
| CG8982  | A19 | 3R | 85D18 | 9502532  | 5'UTR              | <i>RhoL</i>              |                                      | CG8149,<br><i>rump</i>                           |
| CG8982  | A20 | 2L | 35D4  | 15762704 | 5'UTR              | <i>gli</i>               |                                      | CG3793,<br><i>wek</i>                            |
| CG8982  | A78 | 2L | 39A5  | 21151340 | inter              |                          |                                      | <i>del</i> , <i>E2f2</i> ,<br><i>Mpp6</i>        |
| CG8982  | X1  | X  | 9B6   | 10319322 | intron             | <i>alpha-Man-<br/>la</i> |                                      |                                                  |
| CG8982  | X2  | X  | 1C3   | 751606   | intron,<br>intron  | CG5254,<br>CG13362       | <i>sdk</i>                           | CG13361                                          |
| CG8982  | X3  | X  | 3F3   | 3836071  | inter              |                          | <i>ec</i> ,<br>CG2901                | <i>ec</i>                                        |
| CG8982  | X5  | X  | 9E8   | 10772512 | inter              |                          | <i>BTBD9</i> ,<br><i>Atg8a</i>       | CG15211                                          |
| CG8982  | X6  | X  | 18A3  | 19153477 | exon /<br>5' UTR   | <i>RhoGAP18<br/>B</i>    |                                      |                                                  |
| CG8982  | X7  | X  | 13A9  | 15075188 | intron             | <i>Isd-2</i>             |                                      |                                                  |
| CG8982  | X8  | X  | 9B1   | 10070909 | inter              |                          | CG15312                              | ZAP3                                             |
| CG15406 | A1  | 2R | 55E5  | 18652790 | 5' UTR /<br>intron | <i>SP2637</i>            |                                      |                                                  |
| CG15406 | A2  | 2R | 54B7  | 17420952 | 5' UTR /<br>intron | <i>l(2)k01209</i>        | <i>cnk</i>                           | CG6550                                           |
| CG15406 | A3  | 2L | 21B2  | 114687   | 3' UTR             | <i>Sam-S</i>             |                                      | ND-15,<br>CG1369,<br>CG4822                      |
| CG15406 | A4  | 3L | 70A3  | 13227773 | inter              |                          |                                      | <i>caps</i>                                      |
| CG15406 | A5  | 3R | 91B5  | 18584322 | intron,<br>intron  | <i>fray</i> ,<br>CG7694  |                                      |                                                  |
| CG15406 | A6  | 3R | 86E15 | 11679653 | 5' UTR /<br>intron | <i>Taf12</i>             | CG18476,<br>CG14715,<br>CG42327      | <i>Ho</i> ,<br>CG6830,<br>CG6834                 |
| CG15406 | A7  | 2L | 29D1  | 8463898  | 5'UTR              | <i>fu12</i>              |                                      | <i>fu2</i> , <i>d</i>                            |
| CG15406 | A8  | 2L | 21E2  | 869818   | 5'UTR              | <i>dbe</i>               | <i>aru</i>                           | PNUTS                                            |
| CG15406 | A9  | 3R | 96A14 | 24655309 | inter              |                          | CG31125,<br><i>ash2</i> , <i>puf</i> | CG31126,<br><i>Ppox</i>                          |
| CG15406 | A10 | 2R | 56D5  | 19424096 | 5' UTR /<br>intron | <i>hts</i>               |                                      | <i>CalpA</i>                                     |

**Supplementary Table S1. Continued.**

|                |     |    |      |          |                   |                                 |                                   |                                   |
|----------------|-----|----|------|----------|-------------------|---------------------------------|-----------------------------------|-----------------------------------|
| <i>CG15406</i> | A11 | 2L | 26C3 | 6338847  | 5'UTR             | <i>Cpr</i>                      | <i>Pez</i>                        |                                   |
| <i>CG15406</i> | A12 | 3R | 83B6 | 5624328  | 5'UTR,<br>5'UTR   | <i>Spec2</i> ,<br><i>CG2911</i> |                                   | <i>RpL13A</i> ,<br><i>CG31551</i> |
| <i>CG15406</i> | X1  | X  | 6E4  | 6998582  | inter             |                                 | <i>Inx7</i>                       | <i>Inx2</i>                       |
| <i>CG15406</i> | X2  | X  | 4C12 | 4678665  | intron            | <i>rap</i>                      |                                   | <i>Pp2C1</i>                      |
| <i>CG15406</i> | X3  | X  | 9A3  | 9909354  | 3'UTR /<br>intron | <i>CG1986</i>                   |                                   |                                   |
| <i>CG15406</i> | X5  | X  | 6E4  | 6982055  | intron            | <i>ogre</i>                     |                                   | <i>bou</i>                        |
| <i>CG15406</i> | X6  | X  | 11F4 | 13404961 | 5'UTR             | <i>GstT4</i>                    | <i>CG12725</i> ,<br><i>CG1673</i> | <i>CG1998</i>                     |
| <i>CG15406</i> | X7  | X  | 5D3  | 6074869  | 5'UTR             | <i>Tsp5D</i>                    | <i>CG5928</i>                     | <i>CG4660</i> ,<br><i>CG4666</i>  |
